# Supplementary material for: Mechanism for the Potential Inhibition Effect of Microcystin-LR Disinfectant By-Products on Protein Phosphatase 2A
Source: MDPI journal article supplement (doi:10.3390/toxins14120878), 2022-12-16
Supplement: s1 [file s1]

**Table S1.** MS/MS identification of MCLR and MCLR-DBPs

| Basic fragment ions                                                                           | MCLR     | C <sub>34</sub> H <sub>54</sub> N <sub>10</sub> O <sub>12</sub> (P8) | C <sub>49</sub> H <sub>76</sub> N <sub>10</sub> O <sub>14</sub> Cl <sub>2</sub> (P5) | C <sub>49</sub> H <sub>77</sub> N <sub>10</sub> O <sub>15</sub> Cl |             | C <sub>49</sub> H <sub>75</sub> N <sub>10</sub> O <sub>13</sub> Cl |             | C <sub>49</sub> H <sub>76</sub> N <sub>10</sub> O <sub>14</sub> |             |
|-----------------------------------------------------------------------------------------------|----------|----------------------------------------------------------------------|--------------------------------------------------------------------------------------|--------------------------------------------------------------------|-------------|--------------------------------------------------------------------|-------------|-----------------------------------------------------------------|-------------|
|                                                                                               |          |                                                                      |                                                                                      | P6                                                                 | P7          | P1                                                                 | P2          | P3                                                              | P4          |
| [M+H] <sup>+</sup>                                                                            | 995.5559 | 795.3995 ↓ <sup>a</sup>                                              | 1099.4991 ↑                                                                          | 1081.5331 ↑                                                        | 1081.5331 ↑ | 1047.5276 ↑                                                        | 1047.5276 ↑ | 1029.5616 ↑                                                     | 1029.5616 ↑ |
| [Glu-Mdha+H] <sup>+</sup>                                                                     | 213.0834 | 213.0835 √ <sup>b</sup>                                              | 213.0834 √                                                                           | 213.0831 √                                                         | 213.0833 √  | 213.0833 √                                                         | 213.0832 √  | 213.0836 √                                                      | 213.0838 √  |
| [MeAsp-Arg+H] <sup>+</sup>                                                                    | 286.1479 | 286.1477 √                                                           | 286.1481 √                                                                           | 286.1476 √                                                         | 286.1478 √  | 286.1481 √                                                         | 286.1482 √  | 286.1481 √                                                      | 286.1482 √  |
| [Mdha-Ala-Leu-MeAsp-Arg+H] <sup>+</sup>                                                       | 553.3072 | 553.3070 √                                                           | 553.3071 √                                                                           | 553.3070 √                                                         | 553.3070 √  | 553.3073 √                                                         | 553.3072 √  | 553.3067 √                                                      | 553.3069 √  |
| [MeAsp-Arg-Adda+H] <sup>+</sup><br>or [Arg-Adda-Glu+H] <sup>+</sup>                           | 599.3546 | 399.1993 ↓                                                           | 703.2987 ↑                                                                           | 685.3326 ↑                                                         | 685.3327 ↑  | 651.3268 ↑                                                         | 651.3269 ↑  | 633.3606 ↑                                                      | 633.3608 ↑  |
| [Arg-Adda-Glu-Mdha+H] <sup>+</sup>                                                            | 682.3959 | 482.2856 ↓                                                           | 786.3361 ↑                                                                           | 768.3698 ↑                                                         | 768.3699 ↑  | 734.3639 ↑                                                         | 734.3639 ↑  | 716.3978 ↑                                                      | 716.3977 ↑  |
| [Mdha-Ala-Leu-MeAsp-Arg-Adda+H] <sup>+</sup><br>or [Arg-Adda-Glu-Mdha-Ala-Leu+H] <sup>+</sup> | 866.5150 | 666.3568 ↓                                                           | 970.4566 ↑                                                                           | 952.4906 ↑                                                         | 952.4906 ↑  | 918.4858 ↑                                                         | 918.4858 ↑  | 900.5189 ↑                                                      | 900.5190 ↑  |
| Target residues                                                                               | ---      |                                                                      |                                                                                      | Adda                                                               |             |                                                                    |             |                                                                 |             |

<sup>a</sup>: ↑ and ↓ mean mass changes were related to these fragment ions; <sup>b</sup>: √ means ions with the stable m/z were detected by mass spectrograph.

**Table S2.** Preparation and purification information for typical MCLR-DBPs

| MCLR-DBPs | Disinfection times              | LC collection times | Concentration <sup>a</sup> | Purity <sup>b</sup> |
|-----------|---------------------------------|---------------------|----------------------------|---------------------|
| P1        | 20, 30, 40, 50, 60 mins         | 21.67± 0.25 min     | 32.4 µmol/L                | 98.6%               |
| P2        | 20, 30, 40, 50, 60, 70 mins     | 22.29± 0.25 min     | 41.6 µmol/L                | 99.2%               |
| P3        | 30, 40, 50, 60, 70, 80, 90 mins | 17.44± 0.15 min     | 103.2 µmol/L               | 99.6%               |
| P4        | 30, 40, 50, 60, 70, 80, 90 mins | 17.85± 0.15 min     | 128.3 µmol/L               | 99.1%               |
| P5        | 20, 30, 40, 50 mins             | 27.44 ± 0.25min     | 22.5 µmol/L                | 99.4%               |
| P6        | 20, 30, 40, 50, 60 mins         | 19.48± 0.25 min     | 49.2 µmol/L                | 98.7%               |
| P7        | 20, 30, 40, 50, 60 mins         | 20.09± 0.25 min     | 20.8 µmol/L                | 99.3%               |
| P8        | 20, 30, 40, 50 mins             | 16.82± 0.25 min     | 52.8 µmol/L                | 99.2%               |

<sup>a</sup>: The concentrations of typical MCLR-DBPs were directly calculated according to their MS signals compared with that of MCLR. MCLR and MCLR-DBPs were assumed had approximate protonated efficiencies.

<sup>b</sup>: The purity of typical MCLR-DBPs was directly calculated according to their MS intensities and defined as  $I_{Pi}/(I_{MCLR}+\sum I_{Pi}) \times 100\%$ .

**Table S3.** The candidate interaction parameters between MCLR/MCLR-DBPs and PP2A

| Molecular simulation parameters                       | MCLR                     | P1        | P2        | P3        | P4        | P5        | P6        | P7        | P8        |
|-------------------------------------------------------|--------------------------|-----------|-----------|-----------|-----------|-----------|-----------|-----------|-----------|
| Combination energy (KJ/Mol)                           | -5388.70                 | -5343.66  | -5391.47  | -5385.90  | -5350.71  | -5344.69  | -5336.77  | -5347.76  | -5358.97  |
| logP (o/w)                                            | -77.5350                 | -78.0770  | -77.3720  | -78.6200  | -79.3250  | -77.9140  | -79.1620  | -79.1620  | -81.4850  |
| logS                                                  | -249.6839                | -249.1139 | -249.7440 | -248.7762 | -248.1461 | -249.8009 | -248.8331 | -248.8331 | -246.0052 |
| Combination area<br>(Å <sup>2</sup> )                 | Total                    | 698.0694  | 691.0163  | 690.4417  | 692.5611  | 695.8382  | 683.0987  | 688.6780  | 684.5360  |
|                                                       | Ala <sup>1</sup> →PP2A   | 51.3982   | 53.3917   | 59.0195   | 59.7478   | 60.5655   | 61.3226   | 61.8029   | 62.0973   |
|                                                       | Leu <sup>2</sup> →PP2A   | 141.2107  | 141.7950  | 140.0439  | 140.464   | 140.4281  | 139.4582  | 140.7596  | 140.6998  |
|                                                       | MeAsp <sup>3</sup> →PP2A | 68.6157   | 68.1460   | 66.8960   | 66.9288   | 67.3469   | 64.7011   | 64.9361   | 64.7248   |
|                                                       | Arg <sup>4</sup> →PP2A   | 111.0707  | 110.4977  | 110.3533  | 109.4538  | 105.0008  | 103.7783  | 106.8322  | 106.0855  |
|                                                       | Adda <sup>5</sup> →PP2A  | 374.1398  | 366.9286  | 362.2490  | 362.9485  | 364.4504  | 353.5948  | 353.0048  | 354.9035  |
|                                                       | Glu <sup>6</sup> →PP2A   | 170.7896  | 166.3016  | 164.2712  | 165.9308  | 165.3219  | 163.5029  | 164.2210  | 163.7905  |
|                                                       | Mdha <sup>7</sup> →PP2A  | 122.1555  | 122.1173  | 122.2674  | 122.3941  | 122.4282  | 120.9693  | 118.3658  | 118.6729  |
| Positive accessible<br>surface area (Å <sup>2</sup> ) | Total                    | 439.1316  | 435.6923  | 430.8363  | 437.7828  | 432.8109  | 420.4103  | 424.9225  | 425.8085  |
|                                                       | Ala <sup>1</sup> →PP2A   | 26.4509   | 27.9869   | 28.4739   | 28.8025   | 29.2864   | 29.2506   | 30.4338   | 30.7539   |
|                                                       | Leu <sup>2</sup> →PP2A   | 90.0988   | 90.2805   | 92.2072   | 91.8388   | 91.7188   | 90.2699   | 90.9062   | 90.8842   |
|                                                       | MeAsp <sup>3</sup> →PP2A | 39.2427   | 38.2746   | 37.7506   | 38.1432   | 35.5680   | 35.9824   | 36.0599   | 35.2263   |
|                                                       | Arg <sup>4</sup> →PP2A   | 76.1616   | 61.3198   | 72.6042   | 73.0512   | 67.0054   | 68.4859   | 70.8275   | 70.8242   |
|                                                       | Adda <sup>5</sup> →PP2A  | 252.6611  | 238.5448  | 215.5528  | 218.9282  | 232.8600  | 203.1143  | 202.1682  | 208.7413  |
|                                                       | Glu <sup>6</sup> →PP2A   | 95.3726   | 90.8768   | 89.9431   | 90.1072   | 89.4909   | 87.3470   | 88.1905   | 88.1352   |
|                                                       | Mdha <sup>7</sup> →PP2A  | 84.5584   | 84.6814   | 83.3083   | 83.3586   | 83.0723   | 82.5923   | 80.0678   | 80.4473   |
| Negative accessible<br>surface area (Å <sup>2</sup> ) | Total                    | 251.3508  | 254.3241  | 261.6056  | 252.7785  | 251.5278  | 275.6880  | 272.7560  | 270.7278  |
|                                                       | Ala <sup>1</sup> →PP2A   | 24.9473   | 25.4045   | 30.5460   | 30.9452   | 31.2296   | 32.0720   | 31.3699   | 31.3429   |

|                                               |                          |          |          |          |          |          |          |          |          |          |
|-----------------------------------------------|--------------------------|----------|----------|----------|----------|----------|----------|----------|----------|----------|
|                                               | Leu <sup>2</sup> →PP2A   | 51.1115  | 51.5144  | 47.8372  | 48.6252  | 48.7095  | 49.1885  | 49.8542  | 49.8154  | 51.7230  |
|                                               | MeAsp <sup>3</sup> →PP2A | 29.3731  | 30.8713  | 28.6459  | 28.5860  | 28.7789  | 28.7189  | 28.8764  | 28.9982  | 25.5459  |
|                                               | Arg <sup>4</sup> →PP2A   | 34.9089  | 37.1777  | 37.7491  | 36.4026  | 36.9956  | 35.2924  | 36.0054  | 35.2610  | 34.0873  |
|                                               | Adda <sup>5</sup> →PP2A  | 122.4788 | 123.3841 | 137.6964 | 127.0203 | 124.5904 | 149.7369 | 154.9806 | 148.6617 | 55.8266  |
|                                               | Glu <sup>6</sup> →PP2A   | 78.4167  | 73.9248  | 74.3285  | 75.8238  | 75.8310  | 75.1561  | 76.0311  | 75.6552  | 78.2868  |
|                                               | Mdha <sup>7</sup> →PP2A  | 37.5967  | 37.4362  | 38.9597  | 39.0353  | 39.3560  | 38.3769  | 38.2987  | 38.2253  | 37.6697  |
|                                               | Total                    | 415.0878 | 403.5900 | 391.1444 | 395.1850 | 401.2825 | 384.3636 | 385.7173 | 382.6232 | 225.5066 |
| Hydrophobic surface<br>area (Å <sup>2</sup> ) | Ala <sup>1</sup> →PP2A   | 9.1599   | 9.0779   | 11.9868  | 12.7465  | 12.7449  | 14.0165  | 14.1496  | 14.0117  | 13.7089  |
|                                               | Leu <sup>2</sup> →PP2A   | 60.8376  | 60.3547  | 58.0986  | 58.0835  | 57.5584  | 58.3567  | 57.9787  | 58.7842  | 53.2171  |
|                                               | MeAsp <sup>3</sup> →PP2A | 8.7165   | 6.9260   | 5.1297   | 4.8409   | 3.3302   | 3.0175   | 3.0157   | 2.8326   | 6.5986   |
|                                               | Arg <sup>4</sup> →PP2A   | 43.0193  | 37.7420  | 40.9852  | 40.3010  | 41.9806  | 38.4102  | 37.7660  | 37.9445  | 37.0601  |
|                                               | Adda <sup>5</sup> →PP2A  | 272.5860 | 248.9771 | 220.9143 | 221.2025 | 243.4168 | 208.4423 | 201.1964 | 211.5261 | 98.4271  |
|                                               | Glu <sup>6</sup> →PP2A   | 49.1993  | 45.2458  | 45.5970  | 47.2925  | 47.8322  | 46.7353  | 46.4343  | 46.8372  | 48.8208  |
|                                               | Mdha <sup>7</sup> →PP2A  | 88.4628  | 87.4585  | 85.8546  | 86.5487  | 86.1776  | 85.7024  | 83.9827  | 84.2291  | 83.7327  |
| Polar surface area<br>(Å <sup>2</sup> )       | Total                    | 275.3944 | 286.4260 | 301.2973 | 295.3763 | 282.0559 | 311.7350 | 311.9608 | 313.9125 | 262.1935 |
|                                               | Ala <sup>1</sup> →PP2A   | 42.2155  | 44.3131  | 47.0332  | 47.0011  | 47.7709  | 47.3063  | 47.6537  | 48.0851  | 48.2618  |
|                                               | Leu <sup>2</sup> →PP2A   | 80.3728  | 81.4399  | 81.9455  | 82.3804  | 81.8697  | 81.1017  | 82.7813  | 81.9153  | 84.8178  |
|                                               | MeAsp <sup>3</sup> →PP2A | 59.8991  | 62.2195  | 61.7666  | 61.8882  | 61.0166  | 61.6837  | 61.9203  | 61.8918  | 61.6053  |
|                                               | Arg <sup>4</sup> →PP2A   | 71.0511  | 61.7554  | 68.3681  | 67.1528  | 62.0200  | 67.3686  | 68.0666  | 68.1404  | 70.7022  |
|                                               | Adda <sup>5</sup> →PP2A  | 112.5535 | 120.0512 | 141.3350 | 134.7460 | 126.0332 | 156.6530 | 154.7085 | 153.8768 | 114.0312 |
|                                               | Glu <sup>6</sup> →PP2A   | 121.7466 | 121.0555 | 118.6547 | 118.6384 | 117.4894 | 116.7680 | 117.7867 | 116.9534 | 115.5049 |
|                                               | Mdha <sup>7</sup> →PP2A  | 33.6925  | 34.6584  | 36.4132  | 35.8450  | 36.2505  | 35.2671  | 34.3835  | 34.4437  | 35.3122  |
|                                               | Total                    | -43.1    | -40.1    | -43.8    | -42.9    | -41.0    | -40.8    | -40.0    | -41.8    | -40.2    |

|                            |                                                  |                  |        |        |        |        |        |        |        |        |
|----------------------------|--------------------------------------------------|------------------|--------|--------|--------|--------|--------|--------|--------|--------|
| Hydrogen bonds<br>(KJ/Mol) | Arg <sup>4</sup> →Pro <sub>213</sub>             | -7.0             | -6.1   | -6.3   | -6.4   | -6.4   | -5.4   | -5.6   | -5.3   | -5.1   |
|                            | Ala <sup>1</sup> ←Arg <sub>268</sub>             | -2.6             | -2.3   | -1.8   | -1.9   | -1.9   | -2.4   | -2.3   | -2.4   | -2.4   |
|                            | Leu <sup>2</sup> ←Arg <sub>89</sub>              | -2.2             | -2.1   | -2.3   | -2.2   | -2.4   | -2.5   | -2.4   | -2.5   | -4.4   |
|                            | MeAsp <sup>3</sup> ←Arg <sub>89</sub>            | -6.6             | -6.4   | -6.3   | -6.3   | -6.6   | -6.1   | -6.2   | -6.3   | -4.3   |
|                            | MeAsp <sup>3</sup> ←Tyr <sub>127</sub>           | -1.6             | -1.7   | -1.7   | -1.9   | -2.4   | -2.2   | -2.1   | -2.2   | -1.7   |
|                            | Arg <sup>4</sup> ←Arg <sub>214</sub>             | -6.6             | -6.4   | -6.2   | -6.2   | -6.4   | -6.1   | -6.1   | -6.1   | -5.7   |
|                            | Adda <sup>5</sup> ←His <sub>118</sub>            | -1.6             | -1.4   | -1.4   | -1.4   | -1.5   | -1.4   | -1.3   | -1.3   | -1.2   |
|                            | Glu <sup>6</sup> ←Arg <sub>89</sub>              | -8.2             | -7.1   | -7.1   | -7.3   | -7.5   | -7.7   | -7.7   | -7.6   | -8.8   |
|                            | Mdha <sup>7</sup> ←Arg <sub>268</sub>            | -6.7             | -6.6   | -6.6   | -6.4   | -5.9   | -6.4   | -6.3   | -6.0   | -6.6   |
|                            | Adda <sup>5</sup> →Arg <sub>214</sub>            | --- <sup>a</sup> | ---    | -2.6   | -2.0   | ---    | ---    | ---    | -1.1   | ---    |
|                            | Adda <sup>5</sup> ←Ala <sub>216</sub>            | ---              | ---    | -0.7   | ---    | ---    | ---    | ---    | ---    | ---    |
| Ionic bonds<br>(KJ/Mol)    | Adda <sup>5</sup> ←Asn <sub>117</sub>            | ---              | ---    | -0.8   | -0.9   | ---    | -0.6   | ---    | -1.0   | ---    |
|                            | Total                                            | -109.8           | -111.0 | -111.5 | -112.3 | -112.0 | -112.2 | -110.7 | -112.1 | -107.6 |
|                            | MeAsp <sup>3</sup> -Arg <sub>89</sub>            | -7.7             | -7.8   | -7.6   | -7.7   | -7.5   | -6.9   | -7.5   | -7.4   | -3.0   |
|                            | Glu <sup>6</sup> -Arg <sub>89</sub>              | -6.9             | -7.3   | -7.3   | -7.6   | -7.3   | -7.5   | -7.5   | -7.4   | -7.5   |
|                            | Glu <sup>6</sup> -Mn <sub>1</sub> <sup>2+</sup>  | -12.1            | -12.5  | -12.2  | -12.2  | -12.4  | -12.3  | -12.2  | -12.3  | -11.7  |
|                            | Glu <sup>6</sup> -Mn <sub>2</sub> <sup>2+</sup>  | -22.8            | -22.9  | -23.1  | -23.5  | -23.6  | -23.4  | -22.9  | -23.7  | -24.6  |
|                            | Asp <sub>57</sub> -Mn <sub>1</sub> <sup>2+</sup> | -12.2            | -12.3  | -12.5  | -12.5  | -12.5  | -12.4  | -12.0  | -12.5  | -12.1  |
|                            | Asp <sub>57</sub> -Mn <sub>2</sub> <sup>2+</sup> | -14.9            | -14.9  | -14.9  | -14.9  | -14.9  | -14.8  | -14.8  | -14.8  | -14.7  |
|                            | Asp <sub>85</sub> -Mn <sub>1</sub> <sup>2+</sup> | -21.0            | -20.9  | -21.4  | -21.4  | -21.4  | -22.5  | -21.5  | -21.6  | -21.7  |
| Metal bonds<br>(KJ/Mol)    | Asp <sub>85</sub> -Mn <sub>2</sub> <sup>2+</sup> | -12.2            | -12.4  | -12.5  | -12.5  | -12.4  | -12.4  | -12.3  | -12.4  | -12.3  |
|                            | Total                                            | -42.2            | -42.5  | -44.0  | -43.2  | -43.2  | -43.2  | -43.6  | -42.9  | -43.2  |
|                            | Glu <sup>6</sup> -Mn <sub>1</sub> <sup>2+</sup>  | -4.2             | -4.6   | -4.8   | -4.8   | -5.0   | -5.0   | -5.2   | -4.8   | -6.0   |

|                                                                         |                                                           |           |           |          |          |          |           |           |           |          |
|-------------------------------------------------------------------------|-----------------------------------------------------------|-----------|-----------|----------|----------|----------|-----------|-----------|-----------|----------|
|                                                                         | Glu <sup>6</sup> -Mn <sub>2</sub> <sup>2+</sup>           | -9.2      | -8.8      | -9.5     | -9.4     | -9.3     | -9.3      | -9.5      | -9.4      | -9.9     |
|                                                                         | Asp <sub>57</sub> -Mn <sub>1</sub> <sup>2+</sup>          | -5.3      | -5.3      | -5.3     | -5.3     | -5.4     | -5.3      | -5.3      | -5.3      | -5.3     |
|                                                                         | Asp <sub>57</sub> -Mn <sub>2</sub> <sup>2+</sup>          | -5.7      | -5.7      | -5.7     | -5.7     | -5.7     | -5.7      | -5.7      | -5.7      | -5.7     |
|                                                                         | Asp <sub>85</sub> -Mn <sub>1</sub> <sup>2+</sup>          | -6.8      | -6.5      | -7.1     | -7.1     | -6.9     | -7.2      | -7.2      | -7.2      | -5.0     |
|                                                                         | Asp <sub>85</sub> -Mn <sub>2</sub> <sup>2+</sup>          | -4.7      | -4.8      | -4.8     | -4.8     | -4.9     | -4.8      | -4.7      | -4.7      | -4.6     |
|                                                                         | His <sub>241</sub> -Mn <sub>1</sub> <sup>2+</sup>         | -2.0      | -2.2      | -2.2     | -2.2     | -2.1     | -1.5      | -1.6      | -1.4      | -2.2     |
|                                                                         | Asn <sub>117</sub> -Mn <sub>1</sub> <sup>2+</sup>         | -4.3      | -4.6      | -4.6     | -3.9     | -3.9     | -4.4      | -4.4      | -4.4      | -4.5     |
| Exposure areas<br>associated with -PO <sub>4</sub><br>(Å <sup>2</sup> ) | Arg <sub>89</sub> +His <sub>118</sub> +Arg <sub>214</sub> | 1001.8087 | 1002.3587 | 954.2913 | 924.2706 | 922.9355 | 1000.8712 | 1001.4561 | 1002.5461 | 998.4578 |
|                                                                         | Arg <sub>89</sub>                                         | 374.1155  | 376.3034  | 377.4064 | 375.9305 | 376.6839 | 372.9275  | 375.6780  | 374.7650  | 370.4567 |
|                                                                         | His <sub>118</sub>                                        | 319.8264  | 313.1279  | 315.9004 | 319.5454 | 320.8376 | 318.6528  | 317.5461  | 315.9704  | 313.5746 |
|                                                                         | Arg <sub>214</sub>                                        | 322.0467  | 374.2768  | 375.9326 | 378.0033 | 381.4669 | 382.916   | 388.9326  | 387.0086  | 395.2576 |
| Active center<br>exposure (Å <sup>2</sup> )                             | Asp <sub>57</sub> + Mn <sub>1</sub> <sup>2+</sup>         | 314.8653  | 317.6787  | 316.2990 | 315.0376 | 319.1743 | 316.2121  | 315.4156  | 315.6590  | 319.0143 |
|                                                                         | Asp <sub>85</sub> + Mn <sub>1</sub> <sup>2+</sup>         | 310.2860  | 311.5403  | 307.4261 | 308.8214 | 308.6803 | 306.9382  | 311.4167  | 308.9003  | 308.6871 |
|                                                                         | Asn <sub>117</sub> + Mn <sub>1</sub> <sup>2+</sup>        | 322.4064  | 321.9360  | 321.7552 | 322.9602 | 326.6022 | 321.1173  | 321.5983  | 322.5563  | 323.6511 |
|                                                                         | His <sub>241</sub> + Mn <sub>1</sub> <sup>2+</sup>        | 356.1933  | 352.6238  | 354.9702 | 354.2555 | 352.9492 | 357.6321  | 354.5722  | 355.0291  | 354.3359 |
|                                                                         | Asp <sub>57</sub> + Mn <sub>2</sub> <sup>2+</sup>         | 311.4394  | 312.0476  | 312.2896 | 312.9623 | 312.7266 | 313.7292  | 313.0031  | 313.7058  | 313.8454 |
|                                                                         | Asp <sub>85</sub> + Mn <sub>2</sub> <sup>2+</sup>         | 319.8060  | 320.0476  | 317.5977 | 317.6063 | 318.1689 | 306.9382  | 319.6428  | 318.2084  | 315.0497 |

<sup>a</sup>: --- no related parameter was detected

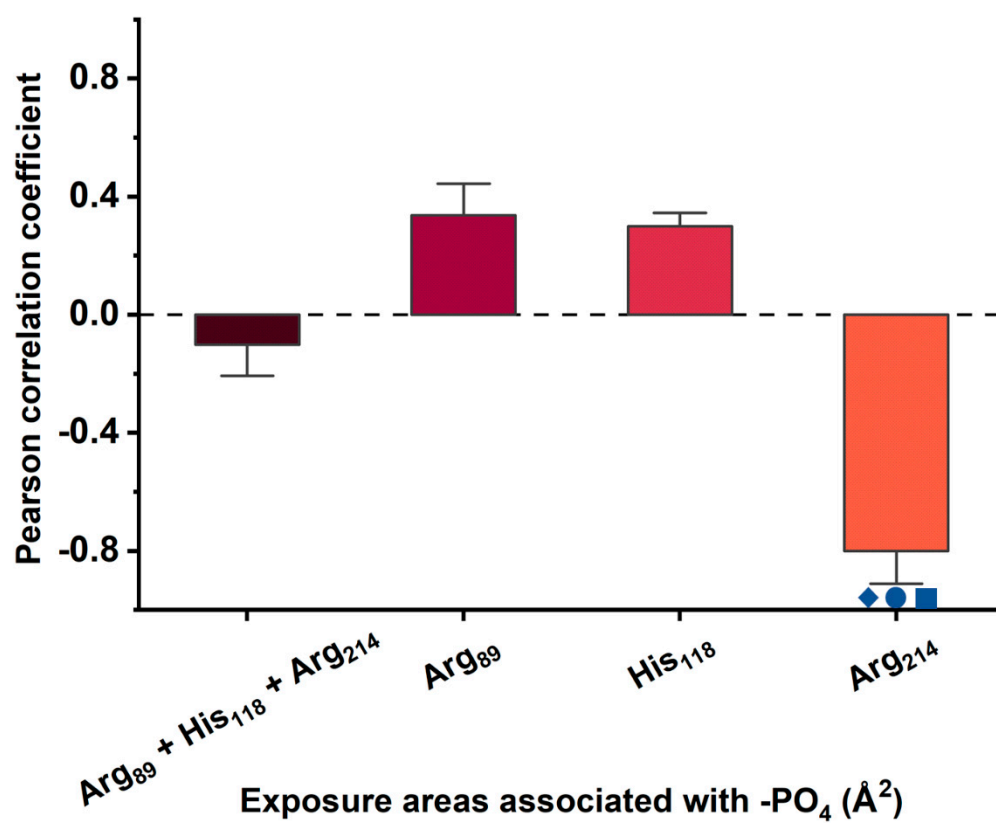

**Figure S1.** Pearson correlation coefficients between inhibition data and exposure areas associated with phosphate group.
